# Supplementary material for: A CD36 ectodomain mediates insect pheromone detection via a putative tunnelling mechanism
Source: PubMed Central journal article supplement (PMC4912623; doi:10.1038/ncomms11866), 2016-06-15
Supplement: ncomms11866-s2.pdf [file ncomms11866-s2.pdf]

### Supplementary Figure 1 | Multiple sequence alignment of CD36 family proteins.

Annotated alignment of the amino acid sequences of various insect SNMP1 proteins (Dm = *Drosophila melanogaster*; Ag = *Anopheles gambiae*; Aa = *Aedes aegypti*; Am = *Apis mellifera*; Ap = *Antheraea polyphemus*; Bm = *Bombyx mori*), twelve other *Drosophila melanogaster* CD36-related proteins, and the three mouse (Mm = *Mus musculus*) CD36 family members. Transmembrane domains (TMD) (predicted using TOPCONS; topcons.cbr.su.se) are marked with blue bars and conserved disulfide bond-forming cysteines are labeled with orange hash marks. Predicted SNMP1 N-glycosylation sites (NXS/T) (using NetNGlyc 1.0; www.cbs.dtu.dk/services/NetNGlyc) are highlighted with purple boxes. The grey bars beneath the alignment indicate the positions of the scanning series of 25-amino acid deletions in the SNMP1 ectodomain (Fig. 3e-f). Other SNMP1 residues mutated in this study are labeled with red asterisks; those linked by a line indicate that these sites were mutated within a single transgene.

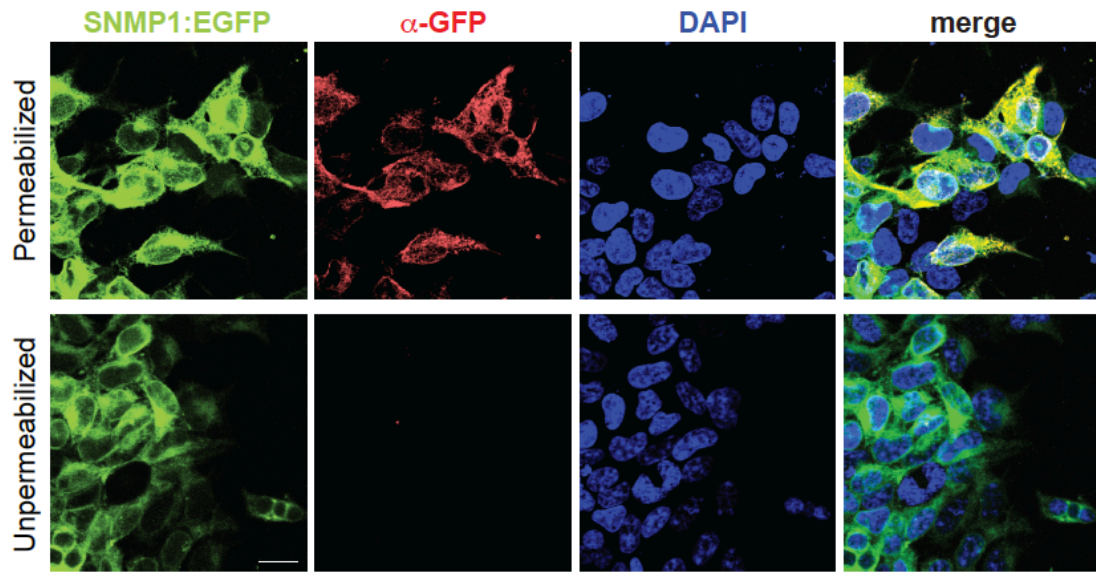

**Supplementary Figure 2 | Membrane topology of SNMP1.**

Native EGFP fluorescence (green) and  $\alpha$ -GFP immunofluorescence (red) of HEK 293 cells expressing SNMP1:EGFP, under membrane permeabilized and unpermeabilized conditions. The DAPI counterstain (blue) labels cell nuclei. The scale bar represents 20  $\mu$ m.

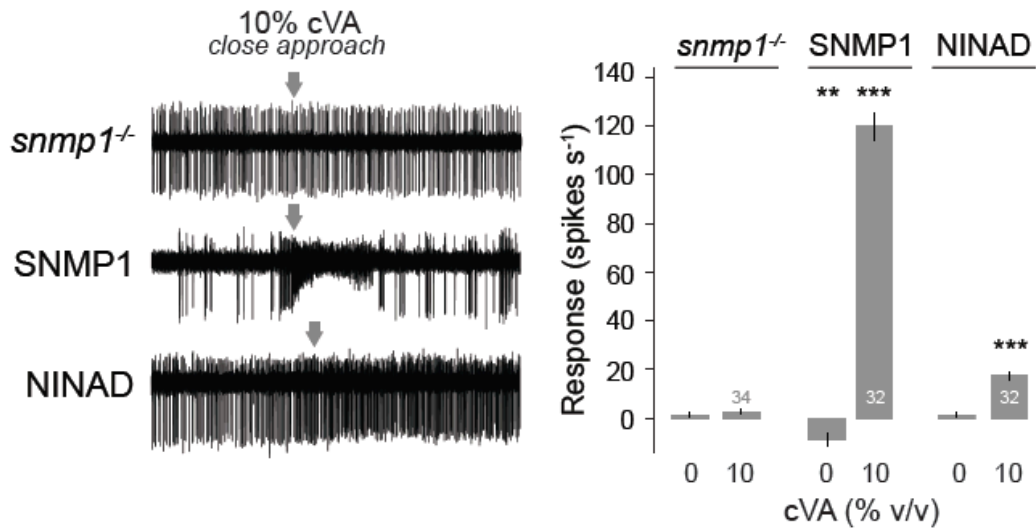

### Supplementary Figure 3 | NINAD weakly restores cVA responses.

Left: Representative traces of electrophysiological recordings of OR67d neurons in a close-range stimulation assay in *snmp1* homozygous mutant, *SNMP1* rescue and *NINAD* rescue flies stimulated with 10% cVA. The grey arrows indicate the approximate time of closest stimulus position to the sensillum; increases in spike frequency were observed in the rescue animals as the stimulus was approaching this point. Right: Mean neuronal responses  $\pm$ SEM to the indicated stimuli in each genotype. The *n* is shown in grey or white above or within the 10% cVA stimulus bar. There are significant statistical differences in neuronal responses due to genotype (Kruskal-Wallis,  $p < 0.0001$ ). Significant differences in cVA responses of the different genotypes compared to *snmp1*<sup>-/-</sup> are indicated (\*\*  $p < 0.01$ , \*\*\*  $p < 0.001$ ).

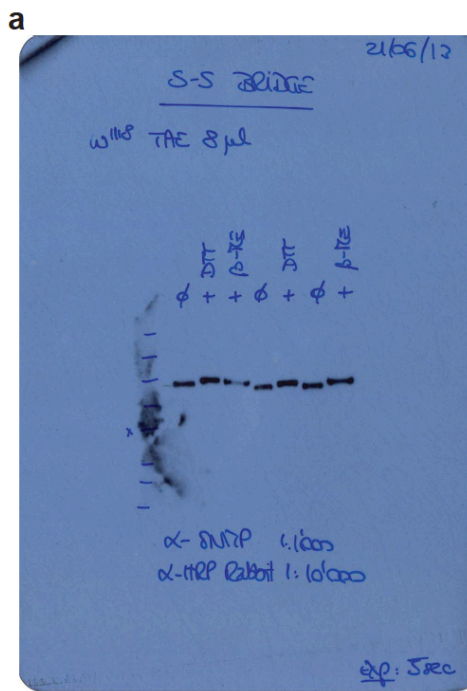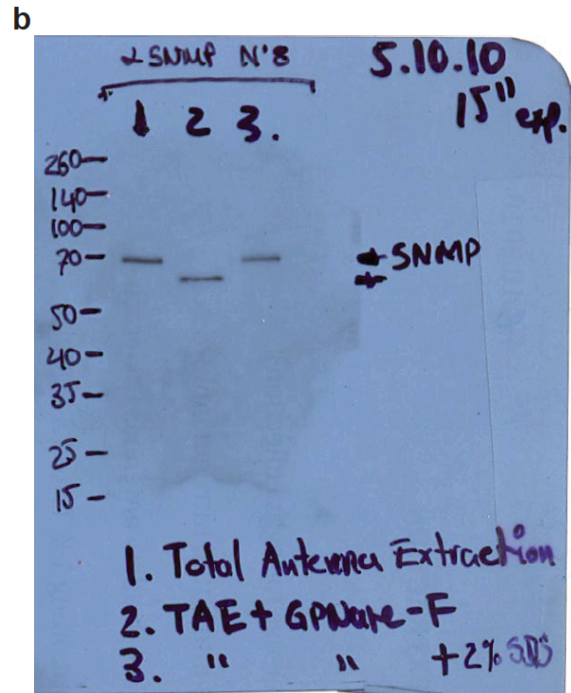

**Supplementary Figure 4 | Analysis of the presence of intramolecular disulfide bonds and N-glycosylation in SNMP1.**

- (a) Complete film of the experiment shown in Fig. 4a.  
(b) Complete film of the experiment shown in Fig. 5a.



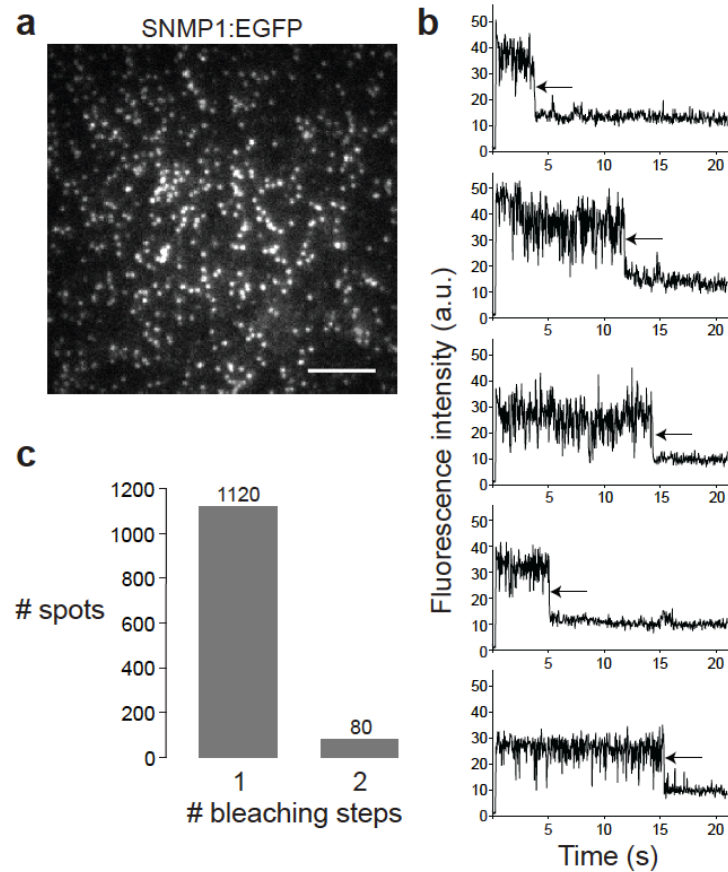

**Supplementary Figure 5 | SNP1:EGFP is principally monomeric.**

(a) Single molecule fluorescence localization in membranes of live *Xenopus* oocytes visualized with total internal reflection fluorescence microscopy. Molecules of SNP1:EGFP were detected as bright spots. The scale bar represents 5  $\mu\text{m}$ .

(b) Representative examples of traces of emitted fluorescence (arbitrary units) from individual spots of oocytes expressing SNP1:EGFP, revealing single prominent bleaching steps (arrows).

(c) Quantification of observed bleaching steps of EGFP signals in oocytes expressing SNP1:EGFP.

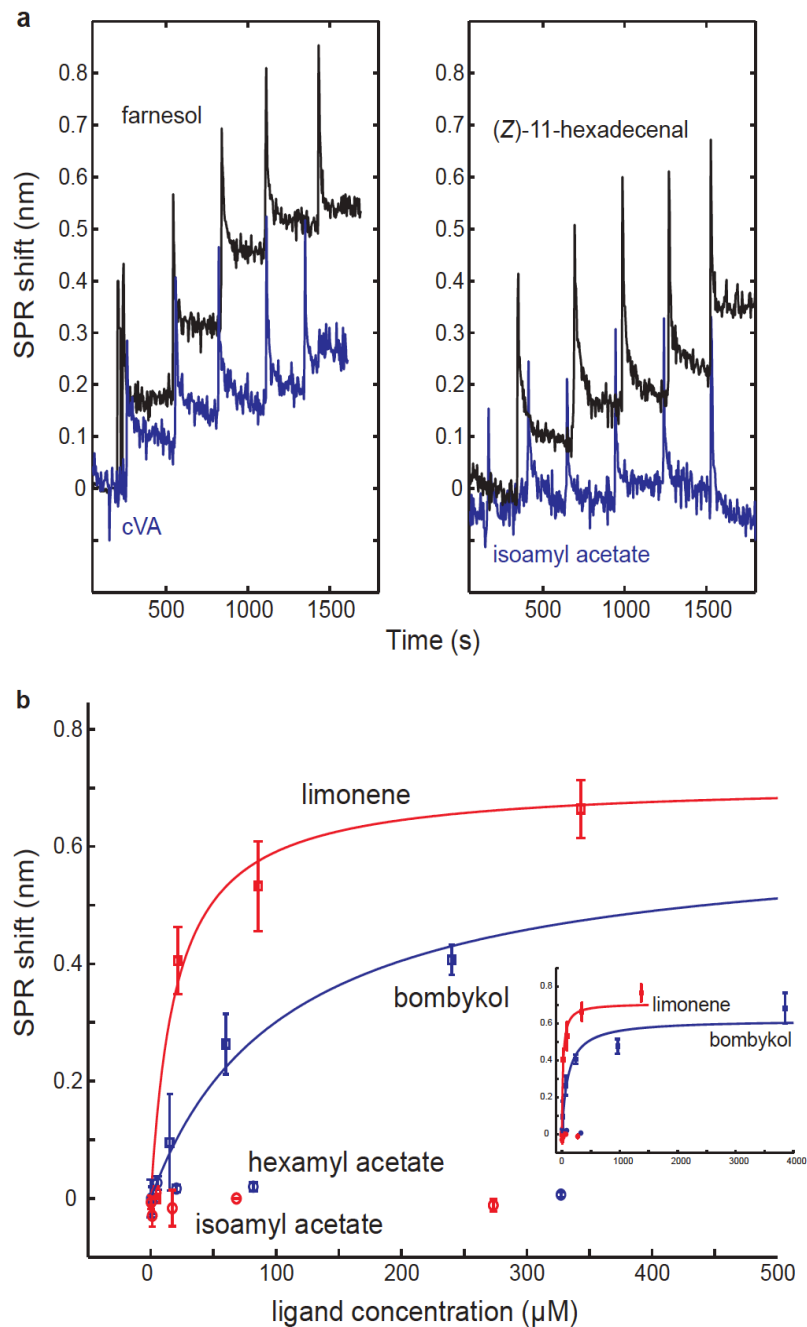

**Supplementary Figure 6 | SPR sensorgram for binding of ligands.**

(a) SPR sensorgram for binding of farnesol (concentrations: 0.29, 1.15, 4.59, 18.4 and 73.4  $\mu\text{M}$ ) and cVA (concentrations: 0.33, 1.31, 5.23, 20.9 and 83.7  $\mu\text{M}$ ) (left) and (Z)-11-hexadecenal (concentrations: 0.18, 0.73, 2.93, 11.7, and 47.0  $\mu\text{M}$ ) and isoamyl acetate (concentrations: 0.32, 1.28, 5.11, 20.5, 81.8 and 327  $\mu\text{M}$ ) (right). The CD36 sensor chips were exposed to increasing concentrations of the ligands and the equilibrium response was measured for the dose-response curves. The spikes in each trace coincide with the injection of successive stimulus doses.

(b) Concentration-response curves of  $\Delta\lambda_{\text{SPR}}$  for the indicated ligands, which were used to calculate the corresponding dissociation constants ( $K_d$ ). The inset represents the same data on an extended x-axis to show the full curves for limonene and bombykol.





**Supplementary Table 1 | Electrophysiological response data.**

| <b>Strain</b>                      | <b>Stimulus</b> | <b>Mean</b> | <b>± SEM</b> | <b>n</b> |
|------------------------------------|-----------------|-------------|--------------|----------|
| wildtype                           | solvent         | -2.1        | 2.4          | 24       |
|                                    | 1% cVA          | 32.4        | 5.1          | 24       |
|                                    | 10% cVA         | 76.1        | 6.3          | 24       |
| <i>snmp1</i> <sup>-/-</sup>        | solvent         | -0.1        | 1.6          | 14       |
|                                    | 1% cVA          | -1.4        | 2.5          | 14       |
|                                    | 10% cVA         | 1.1         | 1.2          | 14       |
| SNMP1                              | solvent         | 1.8         | 0.9          | 25       |
|                                    | 1% cVA          | 52.1        | 4.0          | 25       |
|                                    | 10% cVA         | 80.6        | 4.2          | 25       |
| CD36                               | solvent         | 0.0         | 0.6          | 18       |
|                                    | 1% cVA          | 2.0         | 1.0          | 18       |
|                                    | 10% cVA         | 14.4        | 2.4          | 18       |
| SNMP1:EGFP                         | solvent         | 1.3         | 1.4          | 28       |
|                                    | 1% cVA          | 59.5        | 3.9          | 28       |
|                                    | 10% cVA         | 88.1        | 4.4          | 28       |
| <i>Apo</i> /SNMP1:EGFP             | solvent         | -0.2        | 2.0          | 17       |
|                                    | 1% cVA          | 20.0        | 5.2          | 17       |
|                                    | 10% cVA         | 43.1        | 5.5          | 17       |
| <i>Ame</i> /SNMP1:EGFP             | solvent         | -0.2        | 0.3          | 24       |
|                                    | 1% cVA          | 19.1        | 3.1          | 24       |
|                                    | 10% cVA         | 47.1        | 2.5          | 24       |
| HR13                               | solvent         | 0.4         | 1.3          | 9        |
|                                    | 1% hex          | -0.7        | 2.2          | 9        |
|                                    | 10% hex         | 5.5         | 1.5          | 9        |
| HR13 + CD36                        | solvent         | -1.1        | 1.5          | 14       |
|                                    | 1% hex          | 13.7        | 2.1          | 14       |
|                                    | 10% hex         | 32.3        | 4.4          | 14       |
| HR13 + SNMP1                       | solvent         | 2.8         | 1.1          | 15       |
|                                    | 1% hex          | 49.0        | 3.8          | 15       |
|                                    | 10% hex         | 97.2        | 7.0          | 15       |
| SNMP1 <sup>AN</sup>                | solvent         | 3.0         | 1.0          | 23       |
|                                    | 1% cVA          | 43.3        | 4.5          | 23       |
|                                    | 10% cVA         | 73.6        | 5.7          | 23       |
| SNMP1 <sup>AC</sup>                | solvent         | 0.2         | 1.2          | 18       |
|                                    | 1% cVA          | 31.8        | 3.5          | 18       |
|                                    | 10% cVA         | 54.7        | 4.5          | 18       |
| NINAD                              | solvent         | 1.0         | 0.8          | 25       |
|                                    | 1% cVA          | 0.9         | 0.8          | 25       |
|                                    | 10% cVA         | 0.2         | 0.9          | 25       |
| SNMP1/NINAD:EGFP                   | solvent         | 0.1         | 1.2          | 23       |
|                                    | 1% cVA          | 23.1        | 3.1          | 23       |
|                                    | 10% cVA         | 52.9        | 5.4          | 23       |
| SNMP1 <sup>C265S</sup>             | solvent         | -2.4        | 1.2          | 10       |
|                                    | 1% cVA          | -2.6        | 2.0          | 10       |
|                                    | 10% cVA         | -3.0        | 1.3          | 10       |
| SNMP1 <sup>C294S</sup>             | solvent         | -1.6        | 1.2          | 16       |
|                                    | 1% cVA          | -2.6        | 1.0          | 16       |
|                                    | 10% cVA         | -1.2        | 1.1          | 16       |
| SNMP1 <sup>C332S</sup>             | solvent         | -4.3        | 2.2          | 12       |
|                                    | 1% cVA          | -4.2        | 1.5          | 12       |
|                                    | 10% cVA         | -3.2        | 1.9          | 12       |
| SNMP1 <sup>C330-332-341-352S</sup> | solvent         | -3.1        | 1.9          | 9        |
|                                    | 1% cVA          | -2.1        | 1.2          | 9        |
|                                    | 10% cVA         | -5.6        | 1.1          | 9        |
| SNMP1                              | solvent         | -2.3        | 1.5          | 12       |
|                                    | 1% cVA          | 56.0        | 7.2          | 12       |
|                                    | 10% cVA         | 94.3        | 4.5          | 12       |
| SNMP1 <sup>N66Q</sup>              | solvent         | -1.6        | 0.9          | 9        |
|                                    | 1% cVA          | -2.8        | 0.9          | 9        |
|                                    | 10% cVA         | -6.0        | 2.7          | 9        |
| SNMP1 <sup>N213Q</sup>             | solvent         | 1.7         | 3.5          | 12       |
|                                    | 1% cVA          | 38.2        | 2.9          | 12       |
|                                    | 10% cVA         | 81.5        | 5.1          | 12       |
| SNMP1 <sup>N226Q</sup>             | solvent         | 0.2         | 1.3          | 13       |
|                                    | 1% cVA          | 30.2        | 4.7          | 13       |
|                                    | 10% cVA         | 57.4        | 6.9          | 13       |

|                                     |             |       |      |    |
|-------------------------------------|-------------|-------|------|----|
| SNMP1 <sup>N440Q</sup>              | solvent     | 1.7   | 2.1  | 12 |
|                                     | 1% cVA      | 41.6  | 6.3  | 12 |
|                                     | 10% cVA     | 91.3  | 10.5 | 12 |
| SNMP1 <sup>N213-440Q</sup>          | solvent     | 0.6   | 1.2  | 21 |
|                                     | 1% cVA      | 25.7  | 3.8  | 21 |
|                                     | 10% cVA     | 52.4  | 3.2  | 21 |
| SNMP1 <sup>N213-226-440Q</sup>      | solvent     | 2.0   | 1.0  | 17 |
|                                     | 1% cVA      | 2.4   | 1.6  | 17 |
|                                     | 10% cVA     | 0.0   | 1.4  | 17 |
| SNMP1                               | solvent     | 0.0   | 0.8  | 10 |
|                                     | 1% cVA      | 67.2  | 6.5  | 10 |
|                                     | 10% cVA     | 92.2  | 5.8  | 10 |
| SNMP1 <sup>K158-168-172-174A</sup>  | solvent     | 3.2   | 2.3  | 24 |
|                                     | 1% cVA      | 55.8  | 5.4  | 24 |
|                                     | 10% cVA     | 92.0  | 6.3  | 24 |
| SNMP1 <sup>D186R_E190-191R</sup>    | solvent     | -0.1  | 1.4  | 19 |
|                                     | 1% cVA      | 3.2   | 2.3  | 19 |
|                                     | 10% cVA     | 14.5  | 2.6  | 19 |
| SNMP1 <sup>C187-198S</sup>          | solvent     | 0.9   | 1.3  | 20 |
|                                     | 1% cVA      | 6.8   | 2.1  | 20 |
|                                     | 10% cVA     | 24.9  | 3.5  | 20 |
| SNMP1                               | solvent     | 1.0   | 1.6  | 27 |
|                                     | 0.01% cVA   | 3.5   | 2.1  | 27 |
|                                     | 0.0316% cVA | 3.8   | 2.2  | 27 |
|                                     | 0.1% cVA    | 7.1   | 2.3  | 27 |
|                                     | 0.316% cVA  | 23.4  | 2.9  | 27 |
|                                     | 1% cVA      | 39.5  | 3.0  | 27 |
|                                     | 3.16% cVA   | 60.67 | 3.5  | 27 |
|                                     | 10% cVA     | 81.6  | 5.6  | 27 |
| SNMP1 <sup>T274Y_L439Y</sup>        | solvent     | 0.1   | 1.0  | 30 |
|                                     | 0.01% cVA   | 2.4   | 2.0  | 30 |
|                                     | 0.0316% cVA | -0.8  | 1.5  | 30 |
|                                     | 0.1% cVA    | 4.1   | 1.7  | 30 |
|                                     | 0.316% cVA  | 6.1   | 1.9  | 30 |
|                                     | 1% cVA      | 13.0  | 2.0  | 30 |
|                                     | 3.16% cVA   | 30.2  | 3.0  | 30 |
|                                     | 10% cVA     | 44.3  | 3.2  | 30 |
| SNMP1 <sup>A401Y</sup>              | solvent     | -2.2  | 1.6  | 27 |
|                                     | 0.01% cVA   | 3.8   | 2.7  | 27 |
|                                     | 0.0316% cVA | 4.4   | 2.2  | 27 |
|                                     | 0.1% cVA    | 7.3   | 2.1  | 27 |
|                                     | 0.316% cVA  | 26.1  | 3.0  | 27 |
|                                     | 1% cVA      | 36.0  | 3.2  | 27 |
|                                     | 3.16% cVA   | 48.7  | 4.3  | 27 |
|                                     | 10% cVA     | 67.4  | 5.0  | 27 |
| SNMP1 <sup>V353Y</sup>              | solvent     | 2.9   | 2.4  | 16 |
|                                     | 0.01% cVA   | -0.4  | 2.4  | 16 |
|                                     | 0.0316% cVA | 7.1   | 2.2  | 16 |
|                                     | 0.1% cVA    | -2.9  | 2.8  | 16 |
|                                     | 0.316% cVA  | 16.4  | 3.2  | 16 |
|                                     | 1% cVA      | 29.1  | 2.6  | 16 |
|                                     | 3.16% cVA   | 52.0  | 4.6  | 16 |
|                                     | 10% cVA     | 61.0  | 4.8  | 16 |
| HR13 + SNMP1                        | solvent     | 2.8   | 1.1  | 15 |
|                                     | 0.1% hex    | 13.2  | 2.8  | 15 |
|                                     | 1% hex      | 49.0  | 3.8  | 15 |
|                                     | 10% hex     | 97.2  | 7.0  | 15 |
| HR13 + SNMP1 <sup>T274Y_L439Y</sup> | solvent     | 2.0   | 2.4  | 11 |
|                                     | 0.1% hex    | -0.9  | 2.2  | 11 |
|                                     | 1% hex      | 15.1  | 3.3  | 11 |
| HR13 + SNMP1 <sup>A401Y</sup>       | solvent     | 4.6   | 2.0  | 11 |
|                                     | 0.1% hex    | 13.8  | 2.0  | 10 |
|                                     | 1% hex      | 57.8  | 6.2  | 10 |
|                                     | 10% hex     | 113.3 | 8.2  | 10 |
| HR13 + SNMP1 <sup>V353Y</sup>       | solvent     | 4.0   | 1.4  | 15 |
|                                     | 0.1% hex    | 11.7  | 1.5  | 15 |

|                                          |         |       |     |    |
|------------------------------------------|---------|-------|-----|----|
|                                          | 1% hex  | 32.4  | 3.0 | 15 |
|                                          | 10% hex | 81.5  | 5.1 | 15 |
| <i>snmp1<sup>-/-</sup></i> (close-range) | solvent | 1.4   | 1.1 | 34 |
|                                          | 10% cVA | 2.6   | 1.0 | 34 |
| SNMP1 (close-range)                      | solvent | -8.9  | 2.4 | 32 |
|                                          | 10% cVA | 119.9 | 5.5 | 32 |
| CD36 (close-range)                       | solvent | 0.46  | 1.5 | 35 |
|                                          | 10% cVA | 39.8  | 4.2 | 35 |
| NINAD (close-range)                      | solvent | 1.7   | 1.1 | 32 |
|                                          | 10% cVA | 17.9  | 1.7 | 32 |

**Supplementary Table 2 | Oligonucleotides for transgene generation.**

| <b>Transgene</b>                        | <b>Oligonucleotide sequence 5'⇒3'</b>  |
|-----------------------------------------|----------------------------------------|
| DmSNMP1 sense                           | CAATTGCACACCATGCAAGTACCTCGGGTTAAG      |
| DmSNMP1 antisense                       | CTCGAGTTAGTAGCGCTCCCGATGCTC            |
| AmSNMP1 sense                           | GCGGCCGCCACACCATGAAGCCGAAAAAATTAGG     |
| AmSNMP1 antisense (no stop codon)       | GTCGACATCCGCGTCGAGATTAGGGG             |
| ApolSNMP1 sense                         | GCGGCCGCCACACCATGTTATTGCCAAAGCCGTTG    |
| ApolSNMP1 antisense (no stop codon)     | CTCGAGCATGGTCACTTTAGGTGGTTC            |
| MmCD36 sense                            | CAATTGCACACCATGGGCTGTGATCGGAACT        |
| MmCD36 antisense                        | CTCGAGTTATTTTCCATTCTTGGATTTGC          |
| MmCD36 antisense (no stop codon)        | CTCGAGTTTTCCATTCTTGGATTTGC             |
| DmSNMP1 <sup>ΔN-term</sup> sense        | CAATTGCACACCATGAAGCTGCTCATGGGGTCTGGG   |
| DmSNMP1 <sup>ΔC-term</sup> antisense    | CTCGAGTTATTTGTGGTAGAAAAGATAGG          |
| NINAD sense                             | CAATTGCACACCATGTGCTGCAGCTGCTGTGGGGTGA  |
| NINAD antisense                         | CTCGAGTTAAAAGTTTCGTTTCGACCACGTTG       |
| NINAD antisense (no stop codon)         | CTCGAGAAAAGTTTCGTTTCGACCACGTTG         |
| DmSNMP1:NinaD sense                     | TTAGTGA AATACACACTGAATCTACCGGCT        |
| DmSNMP1:NinaD antisense (no stop codon) | CTTGAGAATTTTGGCCAGCATATTATGGC          |
| DmSNMP1 <sup>Δ1</sup> sense             | TGGCTGGGTTATCTTTAATACTCCATTCCCAC       |
| DmSNMP1 <sup>Δ1</sup> antisense         | GTGGGAATGGAGTATTAAGATAACCCAGCCA        |
| DmSNMP1 <sup>Δ2</sup> sense             | TCGGGAACCTCTGGTCCAAGCCACGGCTACAGG      |
| DmSNMP1 <sup>Δ2</sup> antisense         | CCTGTAGCCGTGGCTTGGACCAGAGCACACCTTCCCGA |
| DmSNMP1 <sup>Δ3</sup> sense             | GGTATCCGAAGGAGCTGTAGAGGACACGGTCA       |
| DmSNMP1 <sup>Δ3</sup> antisense         | TGACCGTGTCTCTACAGCTCCTTCGGATACC        |
| DmSNMP1 <sup>Δ4</sup> sense             | TTTGAGGATGATGTGCGAGGAGGAGATTATTT       |
| DmSNMP1 <sup>Δ4</sup> antisense         | AAATAATCTCCTCCTCGACATCATCTCCAAA        |
| DmSNMP1 <sup>Δ5</sup> sense             | GCTGCCACTTACGGGCATGGAGCTGGTTTCCA       |
| DmSNMP1 <sup>Δ5</sup> antisense         | TGGAAACCAGCTCCATGCCCGTAAGTGGCAGC       |
| DmSNMP1 <sup>Δ6</sup> sense             | GGAAAAGGCTGCCATGTTATTTTTCCGCGGCA       |
| DmSNMP1 <sup>Δ6</sup> antisense         | TGCCGCGGAAAAATAACATGGCAGCCTTTTCC       |
| DmSNMP1 <sup>Δ7</sup> sense             | AGCTAAATTTATGGATACGGGAGAAAATTAAGC      |
| DmSNMP1 <sup>Δ7</sup> antisense         | GCTTAATTTCTCCCGTATCCATAAATTTAGCT       |
| DmSNMP1 <sup>Δ8</sup> sense             | CTGCACCGTGTCTTACTCGGATTCTGGCAGAT       |
| DmSNMP1 <sup>Δ8</sup> antisense         | ATCTGCCAGAATCCGAGTAAAAACACGGTGCAG      |
| DmSNMP1 <sup>Δ9</sup> sense             | GGGTCAGGCCAATCACGACGAACCGGAGCAAG       |
| DmSNMP1 <sup>Δ9</sup> antisense         | CTTGCTCCGGTTCGTCGTGATTGGCCTGACCC       |
| DmSNMP1 <sup>Δ10</sup> sense            | GGTAGTGAAATTCGCCCGGGCTTGAAAAAGG        |
| DmSNMP1 <sup>Δ10</sup> antisense        | CCTTTTTCAAGCCCGGGGCGAATTTCACTACC       |
| DmSNMP1 <sup>Δ11</sup> sense            | TTCTACGGTCTTTGCACACAAGTCATCTACC        |
| DmSNMP1 <sup>Δ11</sup> antisense        | GGTAGGATGACTTGTGTGCAAAGACCGTAGAA       |
| DmSNMP1 <sup>Δ12</sup> sense            | GGGCGCTTATTATCAGCTTCATTGTTTCTGCG       |
| DmSNMP1 <sup>Δ12</sup> antisense        | CGCAGAAACAATGAAGCTGATAATAAGCGCCC       |
| DmSNMP1 <sup>Δ13</sup> sense            | ACGTGCCGATGAGAAGGTTGGTGGTCCATTGA       |
| DmSNMP1 <sup>Δ13</sup> antisense        | TCAATGGACCACCAACCTTCTCATCGGCACGT       |
| DmSNMP1 <sup>Δ14</sup> sense            | GAATCTGGCGGCCTGTCTCAATCCGAATGAAA       |
| DmSNMP1 <sup>Δ14</sup> antisense        | TTTCATTCCGATTGAGACAGGCCGCCAGATTC       |
| DmSNMP1 <sup>Δ15</sup> sense            | TGCCGACGTTGATGGTAAGCGTTTGCAGTTTA       |

|                                              |                                                               |
|----------------------------------------------|---------------------------------------------------------------|
| DmSNMP1 <sup>Δ15</sup> antisense             | TAAACTGCAAACGCTTACCATCAACGTGCGCA                              |
| DmSNMP1 <sup>Δ16</sup> sense                 | ACCTTTTCAGGCTGCCTTGCCCATGTTTGGG                               |
| DmSNMP1 <sup>Δ16</sup> antisense             | CCCAAACATGGGCAAGGCAGCCTGAAAAGGT                               |
| DmSNMP1 <sup>Δ17</sup> sense                 | TCTACCCAAGCTGATACTATTTCTGGGCCTAA                              |
| DmSNMP1 <sup>Δ17</sup> antisense             | TTAGGCCAGAAATAGTATCAGCTTGGGTAGA                               |
| DmSNMP1 <sup>C265S</sup> sense               | CCAGATGGCGAGAGCAACACCTTTG                                     |
| DmSNMP1 <sup>C265S</sup> antisense           | CAAAGGTGTTGCTCTCGCCATCTGG                                     |
| DmSNMP1 <sup>C294S</sup> sense               | GCATTCACGCCGGATTTGAGCAGATCCCTGGGCGCTTAT                       |
| DmSNMP1 <sup>C294S</sup> antisense           | ATAAGCGCCAGGGATCTGCTCAAATCCGGCGTGAATG                         |
| DmSNMP1 <sup>C332S</sup> sense               | CTTCATTGTTTCAGCGAAGATCCCG                                     |
| DmSNMP1 <sup>C332S</sup> antisense           | CGGGATCTTCGCTGAAACAATGAAG                                     |
| DmSNMP1 <sup>C330-332S</sup> sense           | GATGAGAAGCTTCATAGCTTCAGCGAAGATCC                              |
| DmSNMP1 <sup>C330-332S</sup> antisense       | GGATCTTCGAGAAGCTATGATGCTTCTCATC                               |
| DmSNMP1 <sup>C341S</sup> sense               | ATCCCGAAGATCTGGACACGAGCCCGCCCAAGGGCACT                        |
| DmSNMP1 <sup>C341S</sup> antisense           | TCATAGTGCCTTGGGCGGGCTCGTGTCCAGATCTTCG                         |
| DmSNMP1 <sup>C352S</sup> sense               | CTATGAATCTGGCGGCCAGCGTTGGTGGTCCATTGATG                        |
| DmSNMP1 <sup>C352S</sup> antisense           | CATCAATGGACCACCAACGCTGGCCGCCAGATTCATAG                        |
| DmSNMP1 <sup>N66Q</sup> sense                | CTATATCTACGTTTTCCAGGTAACCAATCCGGATG                           |
| DmSNMP1 <sup>N66Q</sup> antisense            | CATCCGGATTGGTTACCTGGAAAACGTAGATATAG                           |
| DmSNMP1 <sup>N213Q</sup> sense               | CAGGCCAAACAAGTCCAGCAAACCTCACTTTTTG                            |
| DmSNMP1 <sup>N213Q</sup> antisense           | CAAAAAGTGAGTTTGTCTGGACTTGTGGCCTG                              |
| DmSNMP1 <sup>N226Q</sup> sense               | GTTTATGGGTCAGGCCAGCACTCGGATTCTGGC                             |
| DmSNMP1 <sup>N226Q</sup> antisense           | GCCAGAATCCGAGTGCTGGGCCTGACCATAAAC                             |
| DmSNMP1 <sup>N440Q</sup> sense               | GAGGGCGTGAGTTGCAGAAGACCTACACGAAC                              |
| DmSNMP1 <sup>N440Q</sup> antisense           | GTTCTGTAGGTCTTCTGCAACTGCACGCCCTC                              |
| DmSNMP1 <sup>K158A</sup> sense               | GATGGAGCTGGTTTCCCGCAGGATTAAGCATTGTC                           |
| DmSNMP1 <sup>K158A</sup> antisense           | GACAATGCTTAATCTCGCGAAACCAGCTCCATC                             |
| DmSNMP1 <sup>K168-172-174A</sup> sense       | CGGATGCCGCCCTTTTGGCCGCTGCCTTTATGGATTTATTTTCGCG                |
| DmSNMP1 <sup>K168-172-174A</sup> antisense   | GCGGAAAAATAATCCATAAAGGCAGCGGCCAAAAAGGCGCGGCATCCG              |
| DmSNMP1 <sup>D186R_E190-191R</sup> sense     | GCGGCATCAACGTACGTTGCTCCTCGAGAAGATTCTCCGAAAGGCCTC              |
| DmSNMP1 <sup>D186R_E190-191R</sup> antisense | GAGCGCCTTTCGAGAAATCTTCGAGGAGCAACGTACGTTGATGCCG                |
| DmSNMP1 <sup>C187-198S</sup> sense           | GCATCAACGTAGATTCTCCTCGGAAGAATTCTCCGAAAGGCCTCTCCACCGTGTTCACAG  |
| DmSNMP1 <sup>C187-198S</sup> antisense       | CGTGTAACACCGGTGGAGAGCGCCTTTGCGGAGAATTCTCCGAGGAGGAATACGTTGATGC |
| DmSNMP1 <sup>I274Y</sup> sense               | GTGGGCACTGATTCTTACGTCTTTGCACCGGGC                             |
| DmSNMP1 <sup>I274Y</sup> antisense           | GCCCCGTGCAAAGACGTAAGAATCAGTGCCAC                              |
| DmSNMP1 <sup>L439Y</sup> sense               | GGAGGGCGTGCACTACAACAAGACCTACAC                                |
| DmSNMP1 <sup>L439Y</sup> antisense           | GTGTAGGTCTTGTGTACTGCACGCCCTCC                                 |
| DmSNMP1 <sup>A401Y</sup> sense               | CTGGAACACCTTTTCAGTACGCCAAGCGTTTGCAGT                          |
| DmSNMP1 <sup>A401Y</sup> antisense           | ACTGCAAACGCTTGGCGTACTGAAAAGGTGTTCCAG                          |
| DmSNMP1 <sup>V353Y</sup> sense               | AATCTGGCGGCCTGTTATGGTGGTCCATTGAT                              |
| DmSNMP1 <sup>V353Y</sup> antisense           | ATCAATGGACCACCATAACAGGCCGCCAGATT                              |
| DmSNMP1 sense                                | CGTCTAGAATGCAAGTACCTCGGGTTAAG                                 |
| DmSNMP1 antisense (no stop codon)            | CGGGATCCGTAGCGCTCCCGATGCTCCAT                                 |
| eGFP sense (for pCG)                         | GCGGCCGCTACTTGTACAGCTCGTCCATGCCG                              |
| eGFP antisense (for pCG)                     | GGATCCCACACCATGAGCAAGGGCGAGGAGC                               |
| eGFP sense (for pXpress)                     | CTCGAGATGGTGAGCAAGGGCGAGGAG                                   |
| eGFP antisense (for pXpress)                 | CTCGAGTTACTTGTACAGCTCGTCCAT                                   |

Restriction sites and/or *Drosophila* Kozak consensus sequence are included, where applicable, in the sequences (Dm = *Drosophila melanogaster*; Am = *Apis mellifera*; Ap = *Antheraea polyphemus*; Mm = *Mus musculus*).
